# Supplementary material
Source: PubMed Central journal article supplement (PMC2703178)
Supplement: NIHMS87597-supplement-Supplemental_Data.pdf [file NIHMS87597-supplement-Supplemental_Data.pdf]

Cell Host & Microbe, Volume 3

## **Supplemental Data**

### **Lymphotoxin-Mediated Crosstalk between B Cells and Splenic Stroma Promotes the Initial**

### **Type I Interferon Response to Cytomegalovirus**

**Kirsten Schneider, Andrea Loewendorf, Carl deTrez, James Fulton, Antje Rhode, Heather Shumway, Sukwon Ha, Ginelle Patterson, Klaus Pfeffer, Sergei A. Nedospasov, Carl F. Ware, and Chris A. Benedict**

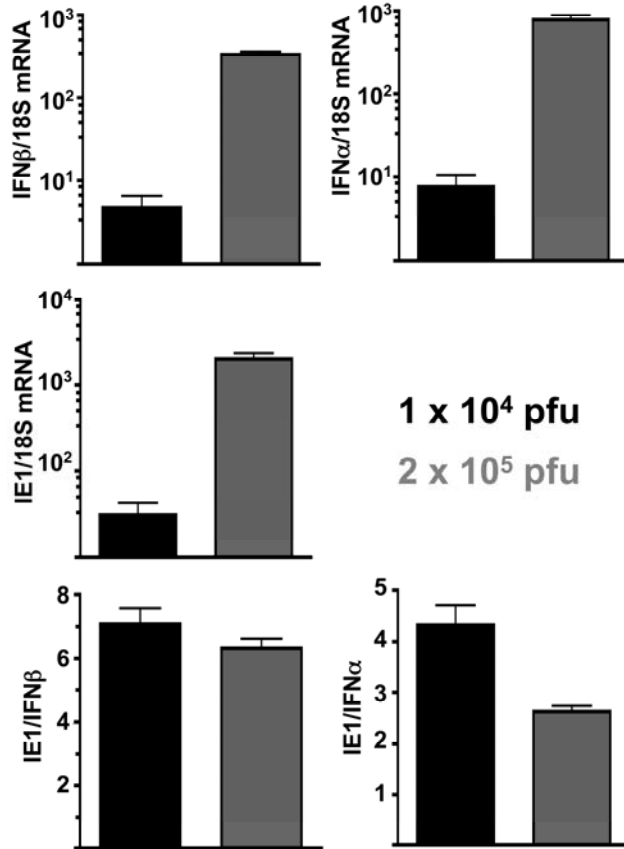

**Suppl. Figure S1. The initial IFN $\alpha\beta$  response to MCMV in the spleen is proportional to viral inoculum.** B6 mice were infected with  $1 \times 10^4$  (black bars) or  $2 \times 10^5$  (gray bars) PFU of MCMV, and spleens were harvested eight hours post infection for qPCR analysis of IFN $\beta$ , IFN $\alpha$  and ie1 mRNA levels. All qPCR data was normalized to 18S rRNA levels ( $\times 10^6$ ), and the ratio of ie1/IFN $\beta$  and IFN $\alpha$  was calculated from the mean values.

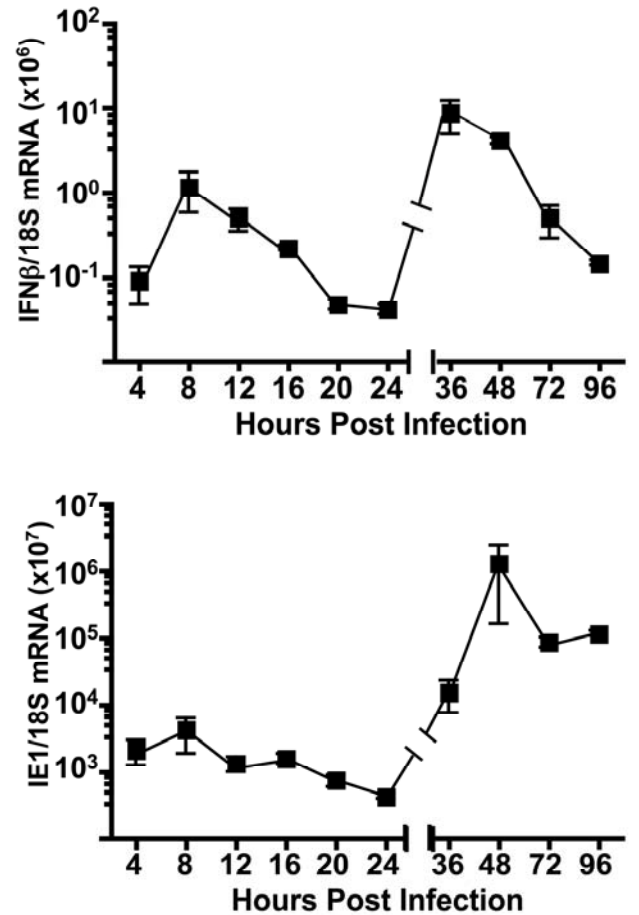

**Figure S2. Analysis of splenic IFN $\beta$  and ie1 mRNA levels during acute MCMV infection in BALB/c mice.** BALB/c mice were infected with  $1 \times 10^5$  PFU of MCMV, and spleens were harvested at various times post infection for analysis of IFN $\beta$  and ie1 mRNA levels by qPCR. Values were normalized to 18S rRNA, and each time point represents 3-4 mice.

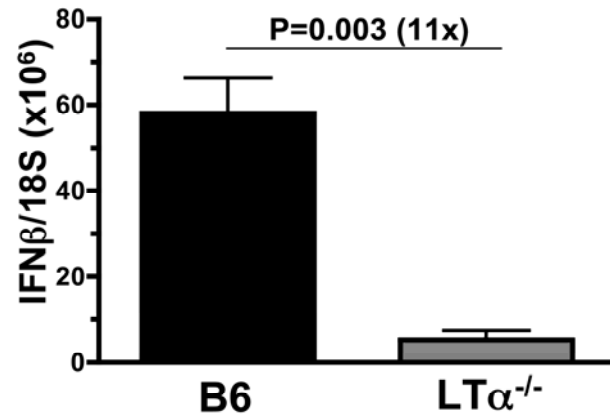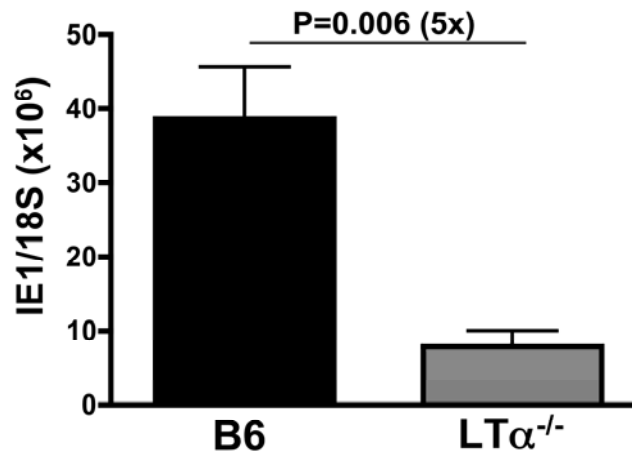

**Figure S3. LTα-deficient mice are defective in IFNβ and ie1 mRNA levels during initial MCMV infection.** B6 or LTα<sup>-/-</sup> mice were infected with 2 x 10<sup>5</sup> PFU of MCMV, and spleens were harvested eight hours post infection for qPCR analysis of IFNβ and ie1 mRNA levels. All values were normalized to 18S rRNA (x10<sup>6</sup>), and statistical significance was assessed by the student's T test.
